# Supplementary material
Source: PubMed Central journal article supplement (PMC6489725)

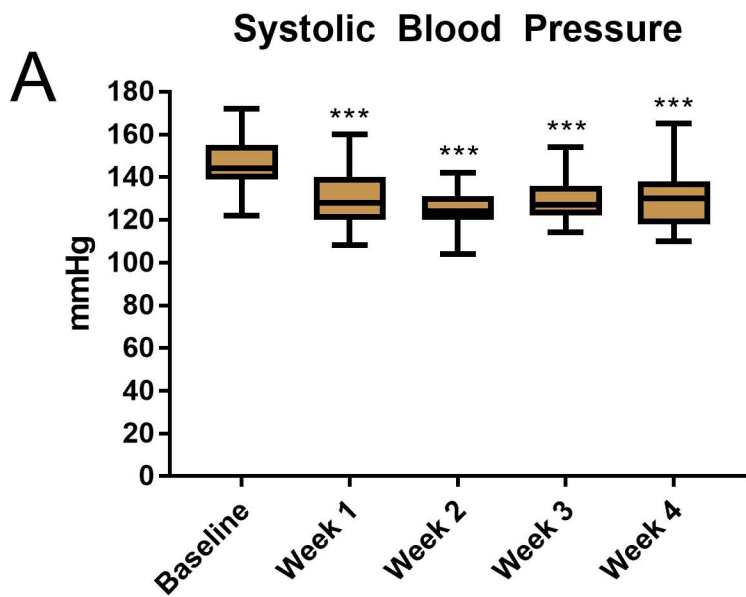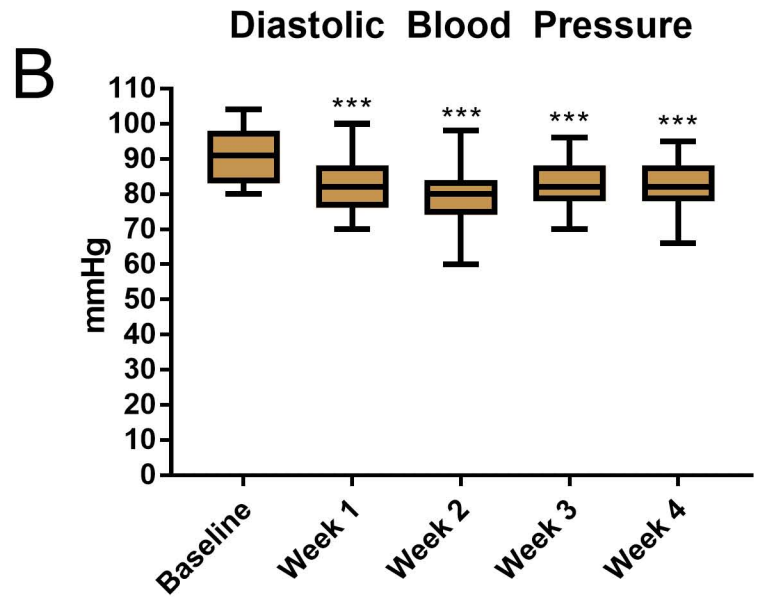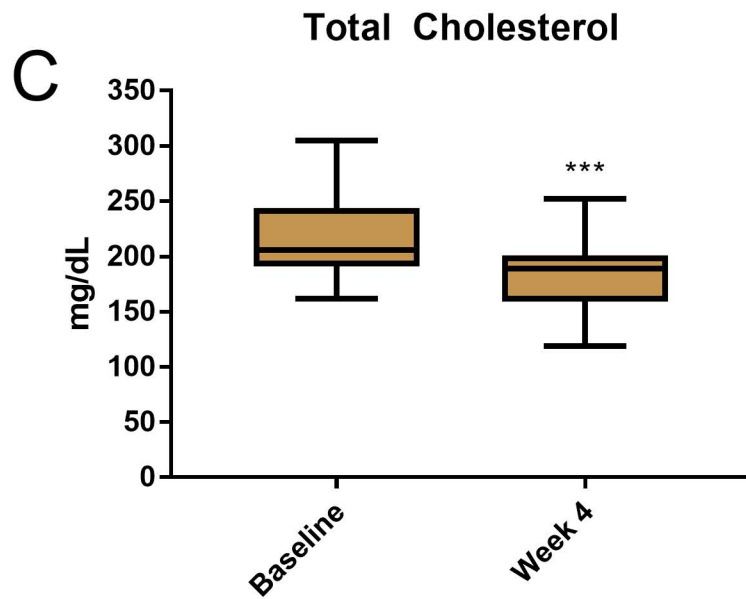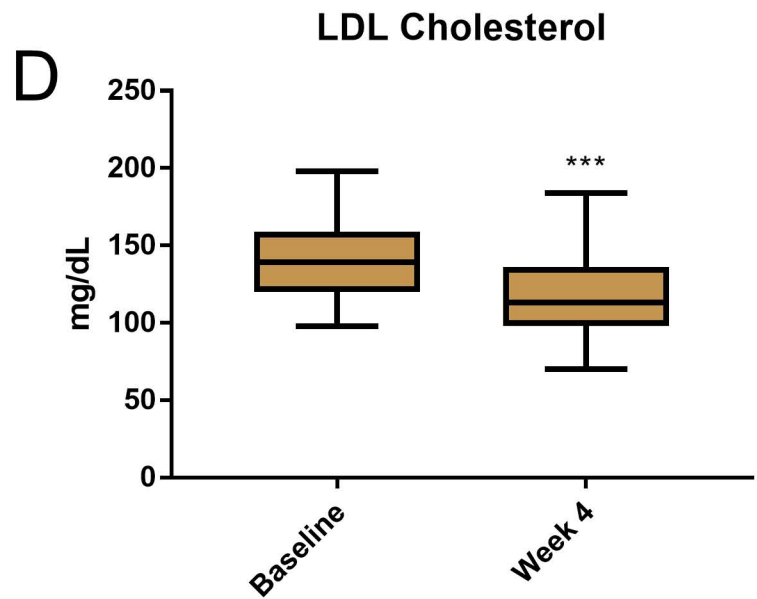

Supplement: CLC-41-307-s001.pdf [file CLC-41-307-s001.pdf]
